# Supplementary material for: A highly selective fluorescence turn-on chemosensor for Zn2+, and its application in live cell imaging, and as a colorimetric sensor for Co2+: experimental and TD-DFT calculations
Source: Royal Society of Chemistry journal article supplement (doi:10.1039/c8nj01580e), 2018-01-01
Supplement: c8nj01580e1.pdf [file c8nj01580e1.pdf]

## Electronic Supplementary Information

### A Highly Selective Fluorescence Turn-On Chemosensor for $\text{Zn}^{2+}$ , its Application in Live Cell Imaging, and a Colorimetric Sensor for $\text{Co}^{2+}$ :

#### Experimental and TD-DFT Calculations

Marzieh Sohrabi,<sup>a</sup> Mehdi Amirnasr,<sup>a,\*</sup> Soraia Meghdadi,<sup>a,\*</sup> Martin Lutz,<sup>b</sup> Maryam Bikhof

Torbati,<sup>c</sup> Hossein Farrokhpour <sup>a</sup>

<sup>a</sup> *Department of Chemistry, Isfahan University of Technology, Isfahan 8415683111, Iran*

<sup>b</sup> *Crystal and Structural Chemistry, Bijvoet Center for Biomolecular Research, Faculty of Science, Utrecht University, Padualaan 8, 3584 CH Utrecht, The Netherlands*

<sup>c</sup> *Department of Biology, College of Basic Science, Shahr-e-Rey Branch, Islamic Azad University, Tehran 1815163111, Iran*

#### **Synthesis of carboxamide ligand, Hbpq**

A mixture of triphenylphosphite (TPP) (5 mmol, 1.55 g), tetrabutylammonium bromide (TBAB) (5 mmol, 1.61 g), pyridine-2-carboxylic acid (5 mmol, 0.62 g), and 8-aminoquinoline (5 mmol, 0.72 g) in a 25-mL round bottom flask was placed in an oil bath. The reaction mixture was heated until a homogeneous solution was formed, and the solution was stirred for 30 min at 120 °C. The final viscous solution was cooled to room temperature and then treated with 10 mL of cold ethanol. The product was precipitated out and filtered off and washed with cold ethanol.

Yield 84%. Anal. Calcd. for  $\text{C}_{15}\text{H}_{11}\text{N}_3\text{O}$ : C, 72.28; H, 4.45; N, 16.86. Found: C, 72.18; H, 4.27; N, 16.76%. FT-IR (KBr,  $\text{cm}^{-1}$ )  $\nu_{\text{max}}$ : 3295 (s, N-H), 1681 (s, C=O), 1529 (m, C=C), 1487 (m, C-N). UV-Vis: [ $\text{CH}_3\text{CN}$ ;  $\lambda_{\text{max}}$  (nm) ( $\epsilon$ ,  $\text{L mol}^{-1} \text{cm}^{-1}$ ): 328 (12240), 276 (7510), 241 (23950).  $^1\text{H}$  NMR ( $\delta$ ,  $\text{CDCl}_3$ , 500 MHz): 7.45-7.63 (m, 4H,  $\text{H}_{\text{b,d,e,i}}$ ), 7.91 (td,  $\text{H}_{\text{h}}$ ), 8.18 (dd,  $\text{H}_{\text{c}}$ ), 8.35 (bd,  $\text{H}_{\text{g}}$ ), 8.78 (bd,  $\text{H}_{\text{f}}$ ), 8.96 (dd,  $\text{H}_{\text{j}}$ ), 9.01 (dd,  $\text{H}_{\text{a}}$ ), 12.27 (s, NH).

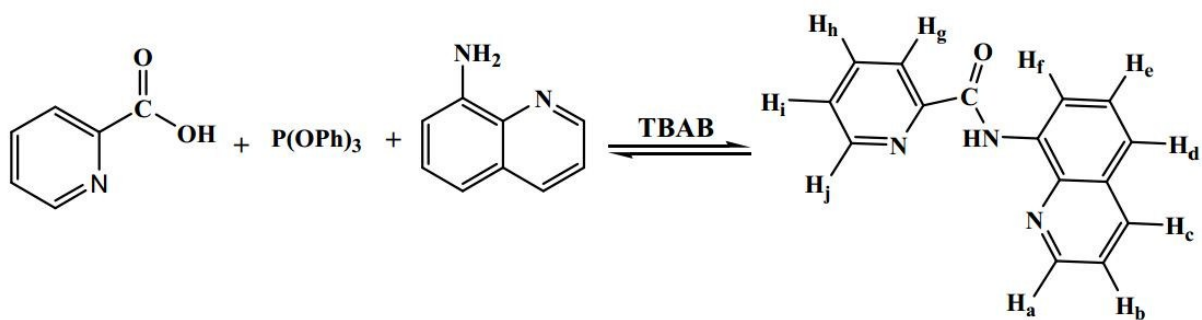

**Scheme S1.** One pot synthesis of N-(8-quinolyl)pyridine-2-carboxamide ligand, Hbpq.

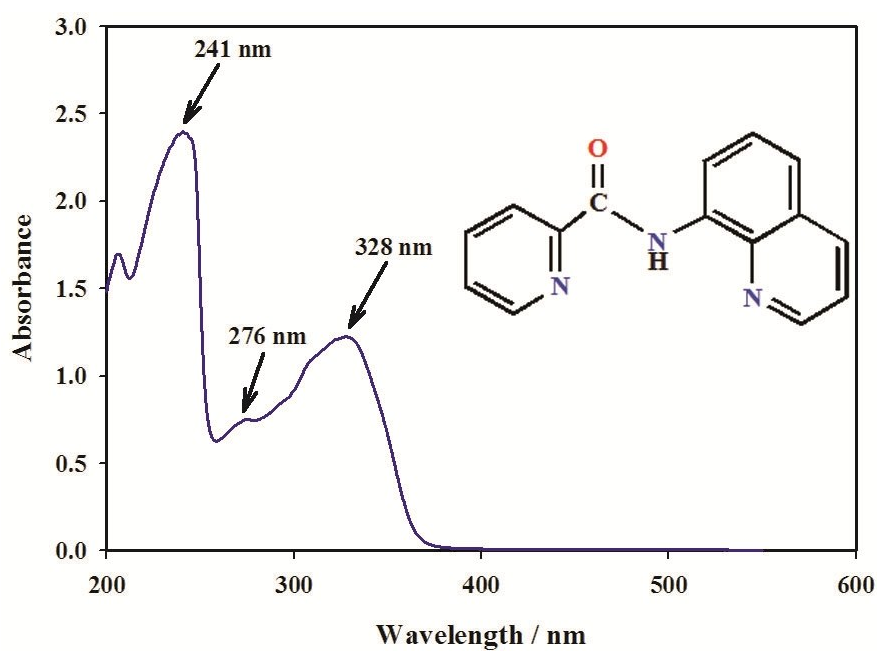

**Fig. S1-1.** UV-vis spectrum of Hbpq in acetonitrile, solution at room temperature.

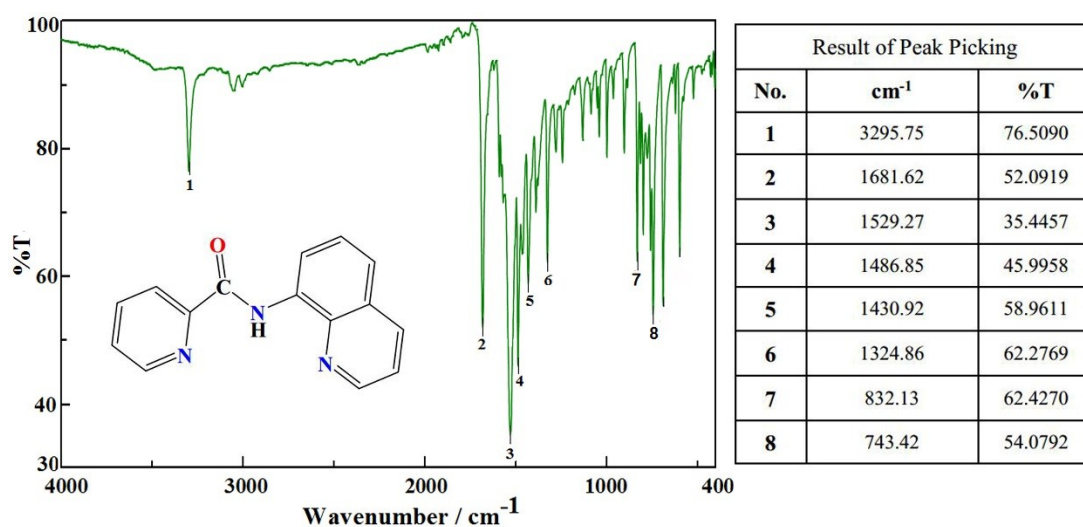

**Fig. S1-2.** FT-IR spectrum of Hbpq (KBr pellet).

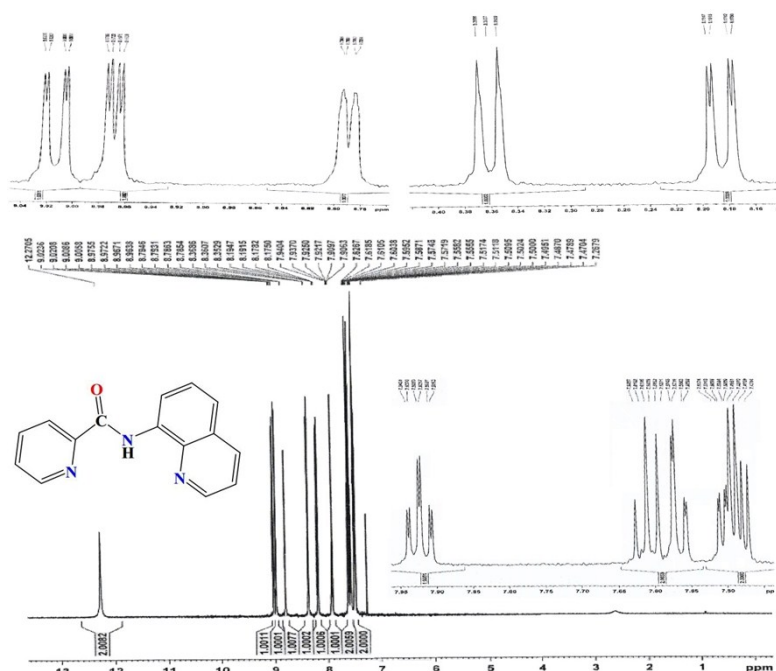

**Fig. S1-3.**  $^1\text{H}$  NMR spectrum of Hbpq in  $\text{CDCl}_3$ , solution at room temperature.

### Determination of association constant for $\text{Zn}^{2+}$ complex

An association constant (2:1) was calculated according to the titration curve for complex formation between the chemosensors and the metal ions, using the following nonlinear least squares fitting equation:

$$y = \frac{x}{2 \times a \times b \times (1 - x)^2} + \frac{x \times b}{2}$$

Where  $a$  is the association constant,  $b$  is the concentration of chemosensor,  $x$  is  $A_x - A_0 / A_{\text{max}} - A_0$  and  $y$  is the concentration of metal ions [1].

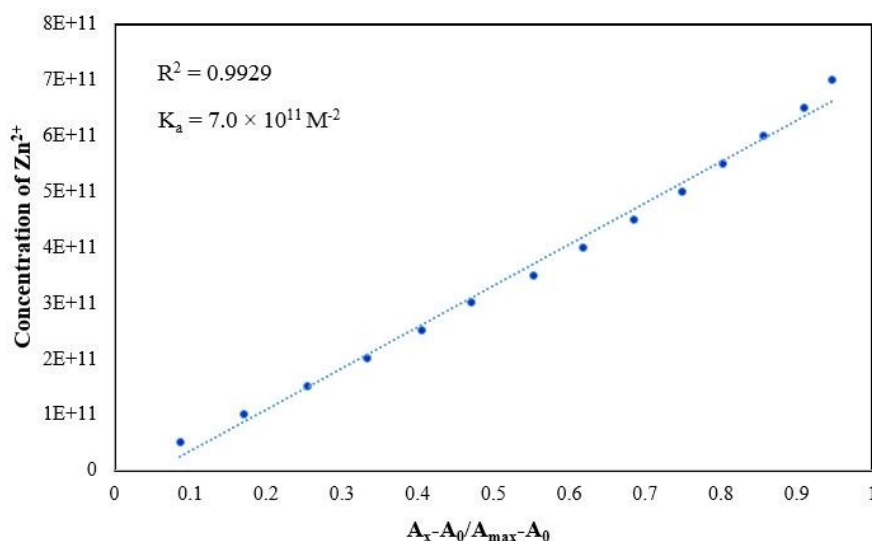

**Fig. S2.** The Benesi-Hildebrand plot of Hbpq with  $\text{Zn}^{2+}$  based on the absorption titration.

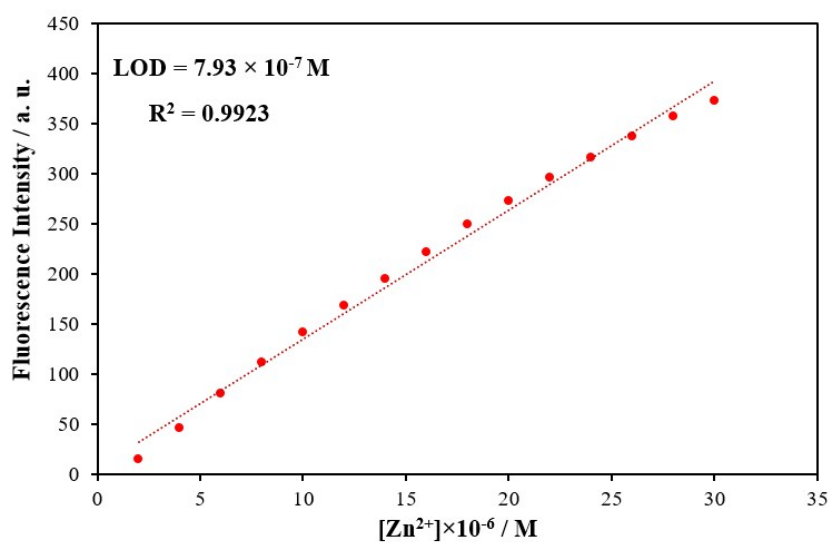

**Fig. S3.** The linear fitting of the fluorescence intensity of Hbpq toward the concentrations of  $Zn^{2+}$ .

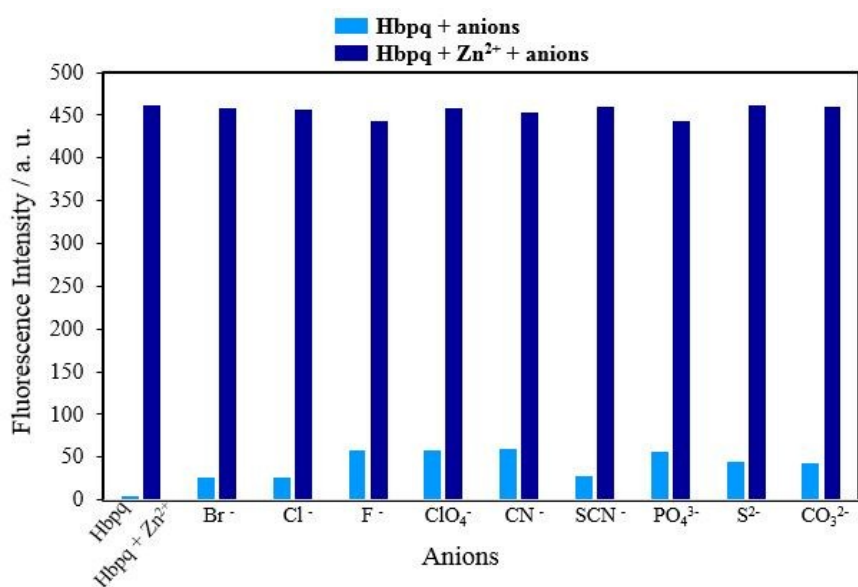

**Fig. S4.** The relative fluorescence intensity of Hbpq and  $[Zn(bpq)_2]$  in the presence of interfering anions.

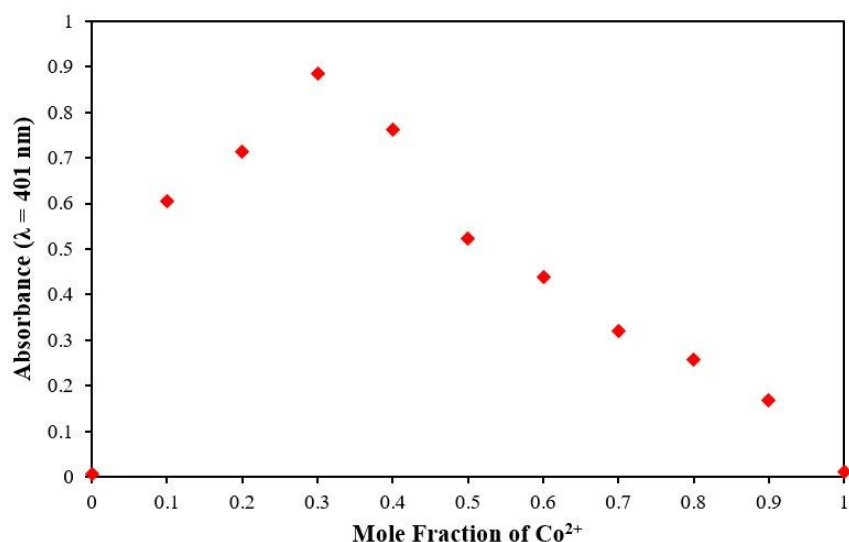

**Fig. S5.** Job's plot of the [Co(bpq)<sub>2</sub>] complex in acetonitrile solution, with the monitoring wavelength set at 401 nm.

#### Determination of association constant for Co<sup>2+</sup> complex

An association constant (2:1) was calculated according to the titration curve for complex formation between the chemosensors and the metal ions, using the following nonlinear least squares fitting equation:

$$y = \frac{x}{2 \times a \times b \times (1 - x)^2} + \frac{x \times b}{2}$$

Where **a** is the association constant, **b** is the concentration of chemosensor, **x** is  $A_x - A_0 / A_{\max} - A_0$  and **y** is the concentration of metal ions [1].

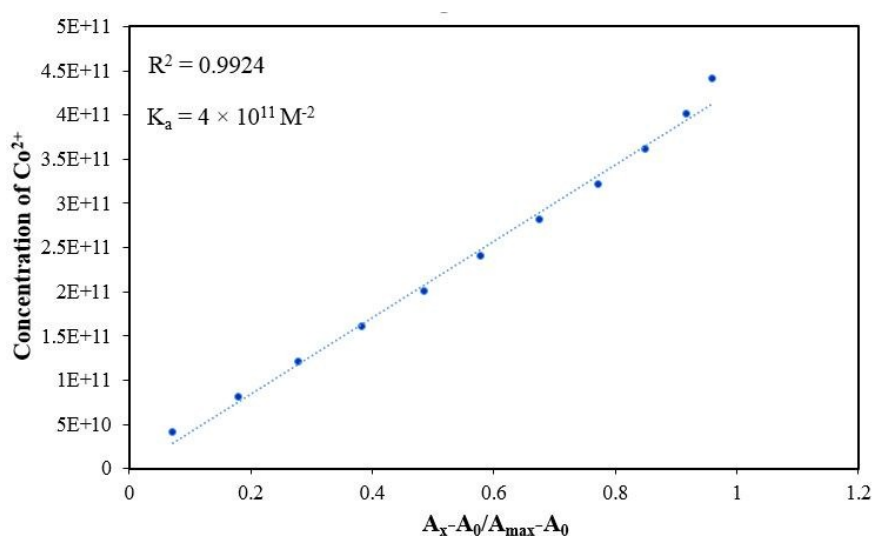

**Fig. S6.** The Benesi-Hildebrand plot of Hbpq with Co<sup>2+</sup> based on the absorption titration.

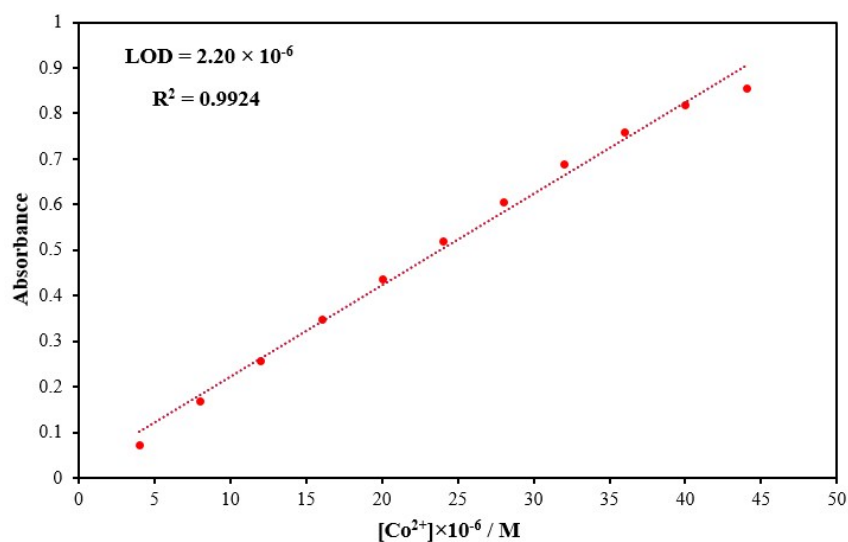

**Fig. S7.** The linear fitting of the absorption intensity of Hbpq toward the concentrations of  $\text{Co}^{2+}$ .

## Reference

1 L. Neupane, J. Park, J. Park, and K. Lee, *org. lett.*, 2013, **15**, 254.

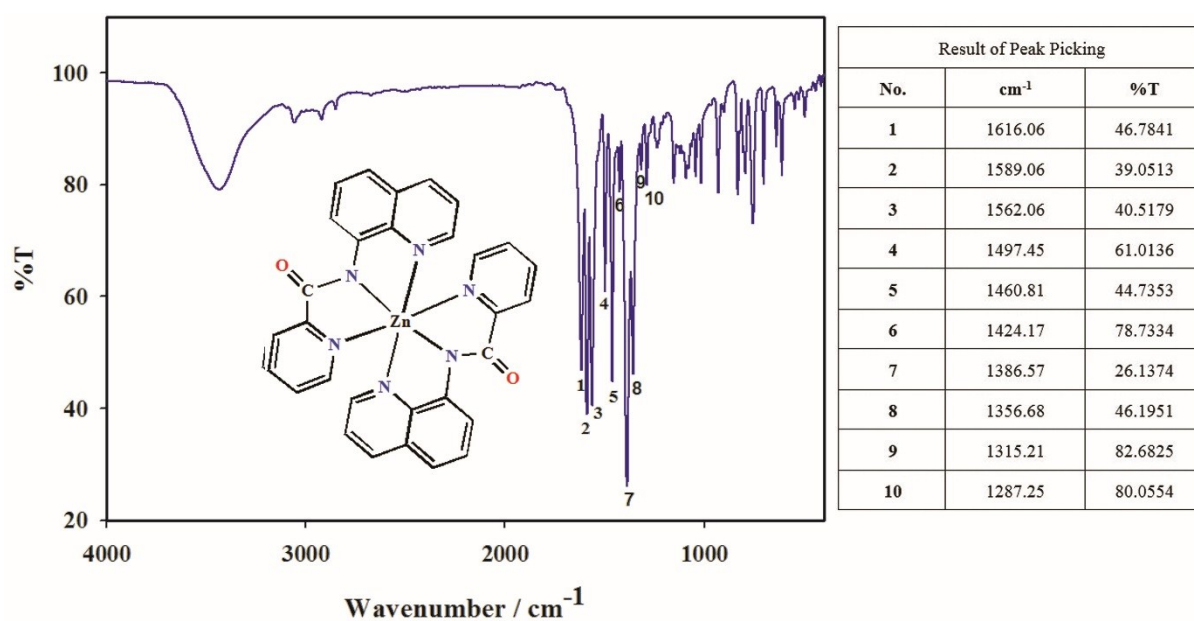

**Fig. S8.** FT-IR spectrum of  $[\text{Zn}(\text{Hbpq})_2]$  as KBr pellet.

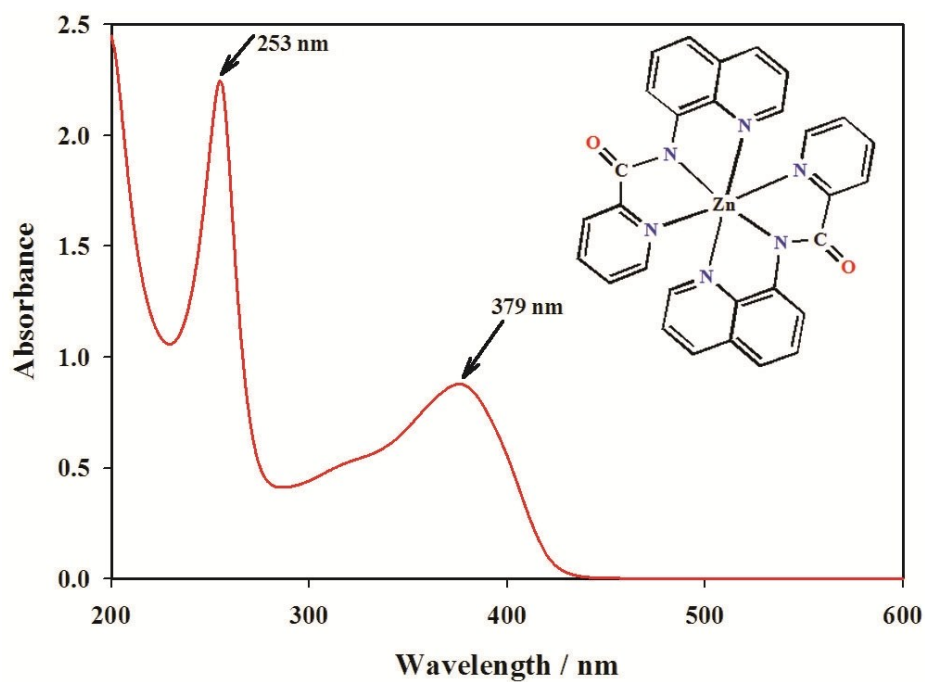

**Fig. S9.** UV-vis spectrum of  $[\text{Zn}(\text{bpq})_2]$  in acetonitrile, solution at room temperature.

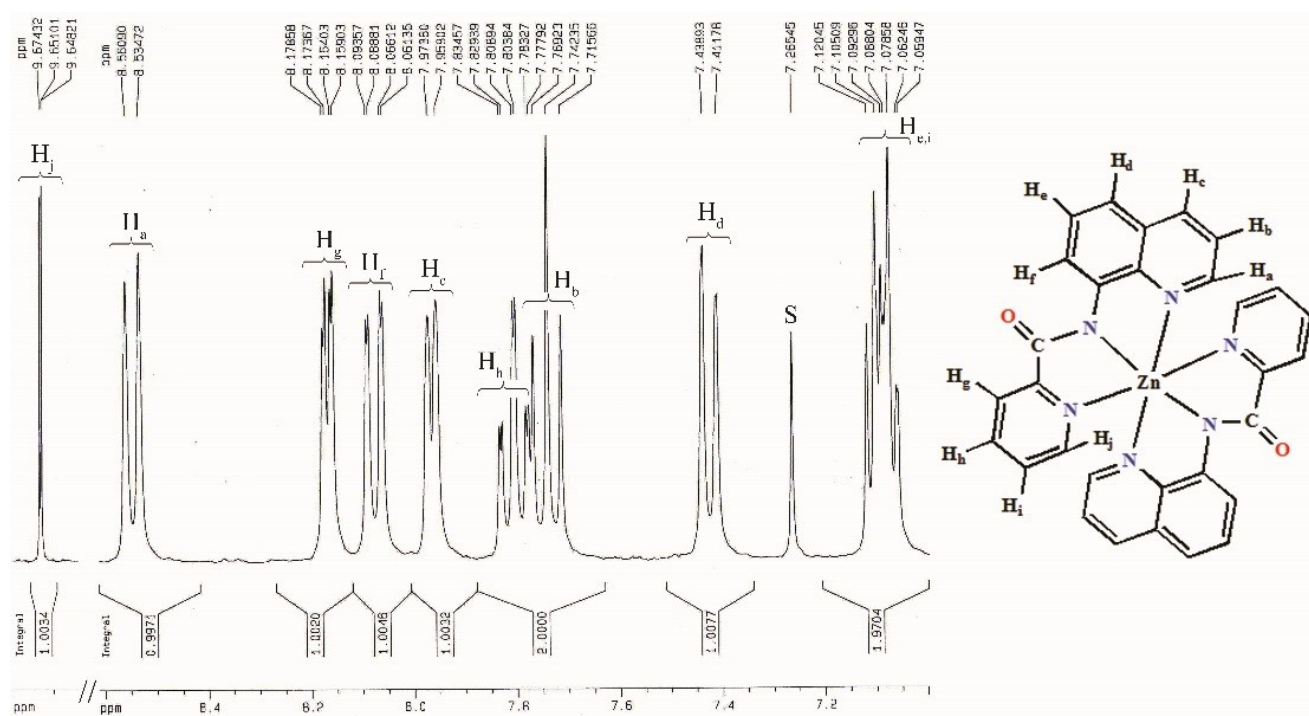

**Fig. S10.**  $^1\text{H}$ -NMR spectrum of  $[\text{Zn}(\text{Hbpq})_2]$  in  $\text{CDCl}_3$  solution at room temperature.

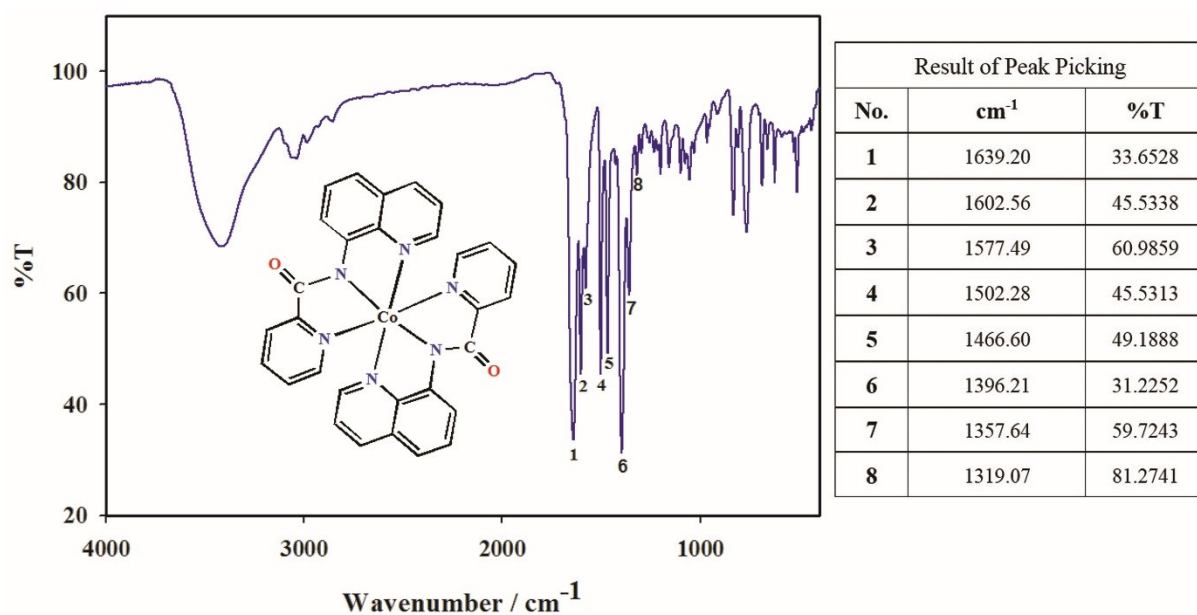

**Fig. S11.** FT-IR spectrum of [Co(Hbpq)<sub>2</sub>] as KBr pellet.

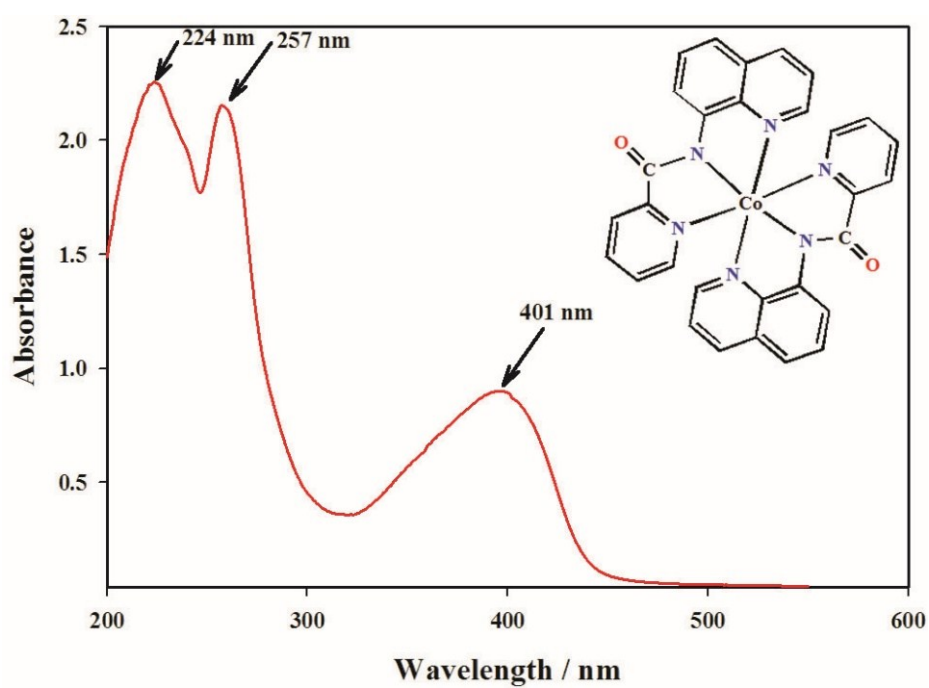

**Fig. S12.** UV-vis spectrum of [Co(bpq)<sub>2</sub>] in acetonitrile, solution at room temperature.
